# Supplementary material
Source: Springer Nature journal article supplement (https://www.springermedizin.de/resource/supplementary/13045_2013_327_MOESM2_ESM.pdf/9661132)

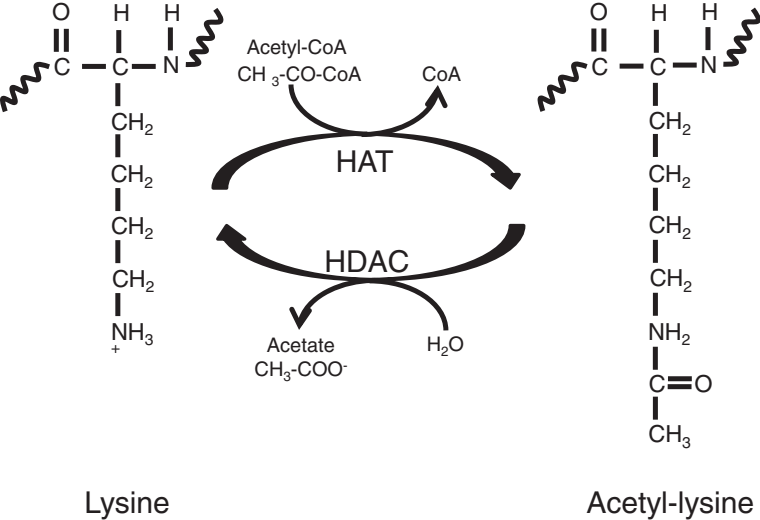

Supplement: MOESM2 [file 9661132]
